# Supplementary material for: A Pectate Lyase Gene Plays a Critical Role in Xylem Vascular Development in Arabidopsis
Source: MDPI journal article supplement (doi:10.3390/ijms241310883), 2023-06-29
Supplement: s1 [file s1]

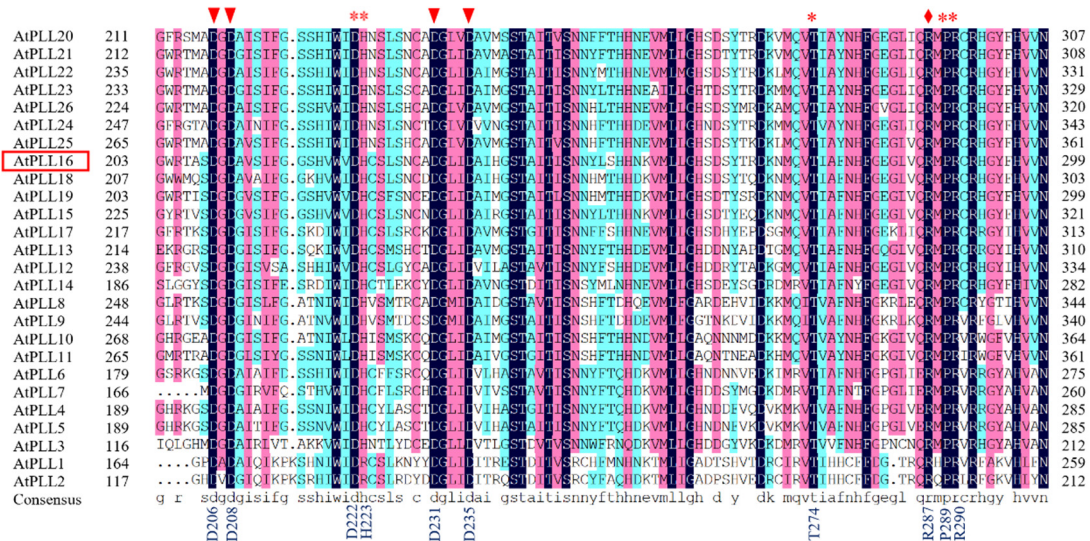

**Supplementary Figure S1.** Multi-sequence alignment of 26 AtPLL proteins. AtPLL16 is highlighted with a red box, conserved residues for Ca<sup>++</sup> binding were shown with red triangles, residues involved in substrate binding were shown with red asterisk and catalysis residues was shown with diamond.
