# Supplementary material for: A Pectate Lyase Gene Plays a Critical Role in Xylem Vascular Development in Arabidopsis
Source: Int J Mol Sci. 2023 Jun 29;24(13):10883. doi: 10.3390/ijms241310883 (PMC10341884; doi:10.3390/ijms241310883)
Supplement: Supplementary file 1 [file ijms-24-10883-s001.zip › Supplementary Table S1.xlsx]

## Sheet: Sheet1
Supplementary Table S1. Properties of AtPLL proteins
Protein	AGI code	Length	MW	pI	SignalP	Pec_C	Target
		(aa)	(kDa)
AtPLL1	AT3G09540	378	41.47	8.1	N.A.	93-291	*
AtPLL2	AT3G55140	331	37.19	7.5	N.A.	31-244	*
AtPLL3	AT5G09280	297	32.98	9.89	N.A.	47-244	_
AtPLL4	AT4G22080	394	43.48	8.51	1-22	120-317	S
AtPLL5	AT4G22090	394	43.3	8.38	1-22	120-317	S
AtPLL6	AT1G11920	384	42.69	9.53	1-23	110-307	S
AtPLL7	AT1G30350	368	40.58	10.14	1-16	109-292	S
AtPLL8	AT1G14420	459	51.45	9.46	1-29	179-376	S
AtPLL9	AT2G02720	455	51.26	10.06	1-25	175-372	S
AtPLL10	AT3G01270	475	53.85	9.36	1-24	199-396	S
AtPLL11	AT5G15110	472	53.84	9.36	1-24	196-393	S
AtPLL12	AT5G04310	518	56.04	7.2	1-34	169-366	*
AtPLL13	AT3G54920	501	53.93	6.45	1-22	154-342	S
AtPLL14	AT5G55720	392	43.68	4.89	1-19	123-314	S
AtPLL15	AT5G63180	432	47.89	6.88	N.A.	156-353	*
AtPLL16	AT1G67750	408	44.89	8.66	1-27	134-331	S
AtPLL17	AT3G53190	483	53.59	6.45	1-24	148-345	S
AtPLL18	AT3G27400	412	45.98	7.95	1-24	138-335	S
AtPLL19	AT4G24780	408	45.01	8.24	1-24	134-331	S
AtPLL20	AT3G07010	416	46.17	8.42	1-24	142-339	S
AtPLL21	AT5G48900	417	46.73	8.68	1-25	143-340	S
AtPLL22	AT3G24670	440	48.76	8.97	N.A.	145-342	_
AtPLL23	AT4G13210	438	48.55	8.54	N.A.	127-324	*
AtPLL24	AT3G24230	452	49.99	8.44	1-25	178-375	S
AtPLL25	AT4G13710	470	51.94	8.24	1-25	196-393	S
AtPLL26	AT1G04680	431	47.77	7.97	1-20	155-352	S
