# Supplementary material for: A Pectate Lyase Gene Plays a Critical Role in Xylem Vascular Development in Arabidopsis
Source: Int J Mol Sci. 2023 Jun 29;24(13):10883. doi: 10.3390/ijms241310883 (PMC10341884; doi:10.3390/ijms241310883)
Supplement: Supplementary file 1 [file ijms-24-10883-s001.zip › Supplementary Table S2.xlsx]

## Sheet: Sheet1
Supplementary Table S2. Primers used in this study
Purpose	Primer name	Primer Sequence
genotyping	AtPLL15.LP	TTAAGCCACGTGACTCATTCC
genotyping	AtPLL15.RP	ACCGAATATTGACACACCGTC	1383bp
genotyping	AtPLL16.LP	CCAAATGATTCATTTGGATGG
genotyping	AtPLL16.RP	TAGTGGCTCGTCTTGGATCAC	763bp
genotyping	AtPLL19.LP	TTACCTCTCATGTACGACCGG
genotyping	AtPLL19.RP	CATAGCTAGACGAGGCTGCAC	1065bp
genotyping	AtPLL26.LP	CCATAGCGAGATCCAGTTGAG
genotyping	AtPLL26.RP	GTCGACACTGCAAAGAGAAG	1033bp
genotyping	LBb1.3	ATTTTGCCGATTTCGGAAC
SqRT	AtPLL15rt.1F	AAAGCCAAAGAAACACAATGC	Around T-DNA
SqRT	AtPLL15.rt.1R	ATCGATTGGATTACCACTCCC
SqRT	AtPLL15.rt.2F	TCTCGTGCGGGAGTGGTAAT	5’ of cDNA
SqRT	AtPLL15.rt.2R	GATCCATAGCGGTTCATCTT
SqRT	AtPLL15.rt.3F	GGAAGTGCTAATCCTACCATCA	3’ of cDNA
SqRT	AtPLL15.rt.3R	ACCCGAGGCTATAGTTATCTCA
SqRT	AtPLL16.rt.1F	ATCACCAAACAAACAAACAC	Around T-DNA
SqRT	AtPLL16.rt.1R	GAGAAAGGACAAGGAGGAGA
SqRT	AtPLL16.rt.2F	TTGACGACTGTTGGAGATGC	5’ of cDNA
SqRT	AtPLL16.rt.2R	CACCGTGGATGATGATGTTG
SqRT	AtPLL16.rt.3F	TTTCTTGCTCCAAACGACCA	3’ of cDNA
SqRT	AtPLL16.rt.3R	CTCCACCCGAAGGCGTAAA
SqRT	AtPLL19.rt.1F	CTCGACGGCTATCACTTTGTC	Around T-DNA
SqRT	AtPLL19.rt.1R	AATCGCATACATCTCCCAATG
SqRT	AtPLL19.rt.2F	TTACCTCTCATGTACGACCGG	5’ of cDNA
SqRT	AtPLL19.rt.2R	TAACTGGGTTGTCGTTTCCTG
SqRT	AtPLL19.rt.3F	ATTGGGAGATGTATGCGATTG	3’ of cDNA
SqRT	AtPLL19.rt.3R	CACCACCAGACGGAGTAAA
SqRT	AtPLL26.rt.1F	CAGCTAAAACAAGAGCTTATCG
SqRT	AtPLL26.rt.1R	TTGTCCTCCACCCAAAATGC
SqRT	AtPLL26.rt.2F	GACATGGCTTTTAGCAATGATG
SqRT	AtPLL26.rt.2R	ATTCGTCACTGCGTGTTGGT
SqRT	AtPLL26.rt.3F	CATAACTCGTTGTCCCATTGC
SqRT	AtPLL26.rt.3R	GCTTTGTCCCTCATGTACGAG
SqRT	AtEF1a.rt.F	GGCTGATTGTGCTGTTCTTA
SqRT	AtEF1a.rt.R	GGGTTGTATCCGACCTTCTT
