# Supplementary material for: A Pectate Lyase Gene Plays a Critical Role in Xylem Vascular Development in Arabidopsis
Source: Int J Mol Sci. 2023 Jun 29;24(13):10883. doi: 10.3390/ijms241310883 (PMC10341884; doi:10.3390/ijms241310883)
Supplement: Supplementary file 1 [file ijms-24-10883-s001.zip › Supplementary Table S3.xlsx]

## Sheet: Sheet1
Supplementary Table S3. Plant height, stem and hypocotyl width and length in atpll16 mutant.
No.	Hypocotyl length (mm)		Hypocotyl width (mm)		Plant height		Stem width
	wt	atpll16	wt	atpll16	wt	atpll16	wt	atpll16
1	2.64	4.39	1.14	1.5	43	28	1.28	0.79
2	2.64	6.55	1.4	1.07	37.5	24.5	0.93	0.54
3	3.73	4.42	1.45	1.07	38.5	21.5	1.07	0.92
4	1.78	4.04	1.47	1.24	43.1	24.9	1.23	0.86
5	2.46	4.39	1.4	1.24	39.9	30.4	0.98	0.73
6	3.07	3.23	1.19	0.99	42.5	30.9	1.05	0.58
7	2.87	5.08	1.37	0.94	45.1	31.9	1.08	0.71
8	3.05	3.96	1.47	0.84	42.5	35	1.33	0.51
9	5.38	6.43	1.35	0.89	42.4	24	0.97	0.87
10	4.22	4.75	1.07	0.91	40.9	32	0.83	0.79
11	3.96	5.44	1.07	1.19	41.6	21.2	0.93	0.63
12	2.51	5.08	1.19	1.09	37.4	21.6	0.99	0.6
13	3.66	4.95	1.57	1.24	41.9	28.4	0.94	0.71
14	3.38	4.5	1.27	1.42	43.2	30.4	1.27	0.7
15	2.92	4.29	1.32	0.91	38.8	18.7	1.24	0.45
16	3.4	3.99	1.19	1.09	38.1	27.4	0.95	0.41
average	3.23	4.72	1.31	1.1	41.03	26.93 (-34%)	1.07	0.68 (-36%)
STDEV	0.85	0.87	0.15	0.19	2.36	4.73	0.15	0.15
