# Supplementary material for: A Pectate Lyase Gene Plays a Critical Role in Xylem Vascular Development in Arabidopsis
Source: Int J Mol Sci. 2023 Jun 29;24(13):10883. doi: 10.3390/ijms241310883 (PMC10341884; doi:10.3390/ijms241310883)
Supplement: Supplementary file 1 [file ijms-24-10883-s001.zip › Supplementary Table S4.xlsx]

## Sheet: Sheet1
Supplementary Table S4. Xylem and Phloem width in AtPLL16 overexpression plants.
No. of plant	xylem width (μm)	phloem width (μm)	xylem/phloem	average	STDEV	student's t-test (p value)
wt-1	379	181	2.09	2.07	0.2
wt-2	338	167	2.02
wt-3	361	194	1.86
wt-4	330	168	1.96
wt-5	366	153	2.39
ox2-1	218	227	0.96	1.02	0.17	9.87074e-06
ox2-2	198	236	0.84
ox2-3	203	219	0.93
ox2-4	220	173	1.27
ox2-5	179	163	1.1
ox5-1	282	216	1.31	1.21	0.18	5.14772e-05
ox5-2	301	256	1.18
ox5-3	268	237	1.13
ox5-4	273	282	0.97
ox5-5	299	206	1.45
